# Supplementary material for: Aβ efflux impairment and inflammation linked to cerebrovascular accumulation of amyloid-forming amylin secreted from pancreas
Source: PubMed Central journal article supplement (PMC9810597; doi:10.1038/s42003-022-04398-2), 2023-01-03
Supplement: 42003_2022_4398_MOESM3_ESM.pdf [file 42003_2022_4398_MOESM3_ESM.pdf]

## Description of Additional Supplementary Files

**File name:** Supplementary Data 1

**Description:** Source data for all the figures.
